# Supplementary material
Source: PubMed Central journal article supplement (PMC3864307)
Supplement: 1309247110_pnas.201309247SI.pdf [file 1309247110_pnas.201309247SI.pdf]

# Supporting Information

## Mundwiler-Pachlatko and Beck 10.1073/pnas.1309247110

**Table S1. Exported proteins of *Plasmodium falciparum* with confirmed location**

| Protein                           | Current ID    | Localization         | Sources     | SP-PEXEL | Other domains    | Species       |
|-----------------------------------|---------------|----------------------|-------------|----------|------------------|---------------|
| REX1 (PFI1735c)                   | PF3D7_0935900 | MC                   | (1)         | No       |                  | fal           |
| REX2 (PFI1740c)                   | PF3D7_0936000 | MC                   | (2)         | No       | TM               | fal           |
| SBP1 (PFE0065w)                   | PF3D7_0501300 | MC                   | (3)         | No       | TM               | fal           |
| MAHRP1 (MAL13P1.413)              | PF3D7_1370300 | MC                   | (4)         | No       | TM               | fal           |
| PFE0050w                          | PF3D7_0501000 | MC                   | (5, 6)      | Yes      |                  | fal           |
| PfPTP2 (MAL7P1.172)               | PF3D7_0731100 | MC, exosomes         | (6, 7)      | Yes      | phist            | fal           |
| PF07_0007                         | PF3D7_0702400 | MC                   | (8)         | No       | TM               | fal           |
| PF07_0008                         | PF3D7_0702500 | MC                   | (8)         | No       |                  | fal           |
| PF13_0275                         | PF3D7_1353100 | MC                   |             | Yes      | TM               | fal           |
| PFD0115c                          | PF3D7_0402400 | MC                   |             | Yes      |                  | fal           |
| PF08_0003                         | PF3D7_0830500 | MC                   | (8)         | No       | TM               | fal           |
| PF11_0505                         | PF3D7_1148900 | MC                   | (8)         | No       | TM               | fal           |
| PF08_0004                         | PF3D7_0830400 | MC                   | (8)         | No       | SP, TM           | fal, viv, kno |
| PFF0090w                          | PF3D7_0601900 | MC                   | (8)         | No       | TM               | fal           |
| PFL0065w                          | PF3D7_1201300 | MC                   | (8)         | No       | SP, TM           | fal, viv      |
| PFL2515c                          | PF3D7_1252300 | MC                   | (8)         | No       | TM               | fal           |
| PF13_0192 (MSRP6)                 | PF3D7_1334500 | MC                   | (8)         | No       | TM               | fal           |
| STARP (PF07_0006)                 | PF3D7_0702300 | MC                   |             | Yes      | Poss. GPI anchor | fal           |
| PIESP2 (PFE0060w)                 | PF3D7_0501200 | MC                   | (6, 9)      | Yes      | 2 TM             | fal           |
| HYP16, Pf23 (PF10_0023)           | PF3D7_1001900 | MC                   | (9)         | Yes      | 2 TM             | fal           |
| ETRAMP10.2 (PF10_0323)            | PF3D7_1033200 | MC                   | (9)         | No       | SP, TM           | fal, viv, kno |
| PfMC-2TM, e.g., PFA0680c          | PF3D7_0114100 | MC, poss. RBCM       | (9–12)      | Yes      | 2 TM             | fal           |
| FEST (MAL7P1.91)                  | PF3D7_0718100 | MC                   | (6, 3)      | No       |                  | fal, viv, kno |
| TEX1 (PFF0165c)                   | PF3D7_0603400 | MC                   | (14)        | No       | RING             | fal, viv, kno |
| FIKK4.1 (PFD1165w)                | PF3D7_0424500 | MC, poss. RBCM       | (15)        | Yes      |                  | fal           |
| FIKK9.3 (PFI0105c)                | PF3D7_0902200 | MC, poss. RBCM       | (15)        | Yes      |                  | fal           |
| FIKK9.6 (PFI0120c)                | PF3D7_0902500 | MC, poss. RBCM       | (15)        | Yes      |                  | fal           |
| FIKK12 (PFL0040c)                 | PF3D7_1200800 | MC, poss. RBCM       | (15)        | Yes      |                  | fal           |
| Pf322 (PF11_0507)                 | PF3D7_1149000 | MC, poss. RBCM       | (16–18)     | No*      |                  | fal           |
| MAL8P1.4                          | PF3D7_0830600 | MC                   |             | Yes      | phist            | fal, viv      |
| PfEFP1 (family)                   | PF3D7_1101800 | MC                   | (19)        | No       | SP               | fal           |
| PfEFP3 (family) HYP4 <sup>†</sup> | PF3D7_0101100 | MC                   | (19)        | Yes      | TM               | fal           |
| PfEFP4 (family) HYP5 <sup>‡</sup> | PF3D7_0631500 | MC                   | (19)        | Yes      |                  | fal           |
| PfEMP1 family                     |               | MC, RBCM             | (20)        | Yes      |                  | fal           |
| KAHRP (PFB0100c)                  | PF3D7_0202000 | MC, RBCM             | (21–23)     | Yes      |                  | fal           |
| PfEMP3 (PFB0095c)                 | PF3D7_0201900 | MC, RBCM             | (24)        | Yes      |                  | fal           |
| SURFIN4.1                         | PF3D7_0402200 | MC, RBCM             | (25)        | No       |                  | fal           |
| SURFIN4.2                         | PF3D7_0424400 | MC, RBCM             | (26, 27)    | No       |                  | fal           |
| STEVIOR family                    |               | MC, RBCM             | (12, 28–31) | Yes      |                  | fal           |
| A-type RIFIN family               |               | MC, RBCM             | (32–37)     | Yes      |                  | fal           |
| PFB0106c                          | PF3D7_0202200 | MC, RBC cytoplasm    | (6)         | Yes      |                  | fal           |
| PFI1780w                          | PF3D7_0936800 | RBCM                 | (38)        | Yes      | phist            | fal           |
| MESA                              | PF3D7_0500800 | RBCM                 | (39, 40)    | No       |                  | fal           |
| RESA                              | PF3D7_0102200 | RBCM                 | (41)        | Yes      | phist, DnaJ      | fal           |
| PFE1605w                          | PF3D7_0532400 | RBCM                 |             | Yes      | phist            | fal           |
| PIESP1 (PFC0435w)                 | PF3D7_0310400 | RBCM                 | (5)         | No       |                  | fal, viv, kno |
| CLAG2, CLAG3.1, CLAG 3.2, CLAG9   |               | Rhoptries, RBCM      | (42–44)     | No       | SP               | fal, viv, kno |
| MAHRP2 (PF13_0276)                | PF3D7_1353200 | Tethers              | (45)        | No       | TM               | fal           |
| HSP40, type II (PFA0660w)         | PF3D7_0113700 | J-dots               | (46)        | Yes      |                  | fal           |
| HSP40, type II (PFE0055c)         | PF3D7_0501100 | J-dots               | (46)        | Yes      |                  | fal           |
| MSRP7 (PF13_0194)                 | PF3D7_1334700 | RBC cytoplasm        | (8)         | No       | SP               | fal           |
| MSRP5 (PF13_0191)                 | PF3D7_1334300 | RBC cyt. side of PVM | (8)         | No       | SP               | fal           |
| PF14_0045                         | PF3D7_1404800 | RBC cyt. side of PVM | (8)         | No       | SP               | fal, viv, kno |
| PF08_0005                         | PF3D7_0830300 | RBC cytoplasm        | (8)         | No       | SP               | fal, viv, kno |
| HSP70-x (MAL7P1.228)              | PF3D7_0831700 | J-dots               | (47, 48)    | No       | SP               | fal           |
| REX3 (PFI1755c)                   | PF3D7_0936300 | RBC cytoplasm        | (2)         | No       | SP               | fal           |

Table S1. Cont.

| Protein            | Current ID    | Localization  | Sources | SP-PEXEL | Other domains | Species       |
|--------------------|---------------|---------------|---------|----------|---------------|---------------|
| HYP17 (PF14_0758)  | PF3D7_1478600 | RBC cytoplasm | (6)     | Yes      |               | fal           |
| GBP130 (PF10_0159) | PF3D7_1016300 | RBC cytoplasm | (49)    | Yes      |               | fal           |
| PF08_0137          | PF3D7_0801000 | RBC cytoplasm |         | Yes      | phist         | fal, viv, kno |

DnaJ, Hsp70 chaperon domain; fal, *Plasmodium falciparum*; kno, *Plasmodium knowlesi*; MC, Maurer's clefts; phist, Plasmodium helical interspersed subtelomeric; PVM, parasitophorous vacuole; RING, really interesting new gene; SP, signal peptide; TM, transmembrane; viv, *Plasmodium vivax*.

\*PEXEL (*Plasmodium* export element), described by Nilsson et al. (18).

<sup>†</sup>On PlasmoDB HYP5, in Mbengue et al. (19), HYP4.

<sup>‡</sup>On PlasmoDB HYP4, Mbengue et al. (19), HYP5.

- Hawthorne PL, et al. (2004) A novel *Plasmodium falciparum* ring stage protein, REX, is located in Maurer's clefts. *Mol Biochem Parasitol* 136(2):181–189.
- Spielmann T, et al. (2006) A cluster of ring stage-specific genes linked to a locus implicated in cytoadherence in *Plasmodium falciparum* codes for PEXEL-negative and PEXEL-positive proteins exported into the host cell. *Mol Biol Cell* 17(8):3613–3624.
- Blisnick T, et al. (2000) Pfsbp1, a Maurer's cleft *Plasmodium falciparum* protein, is associated with the erythrocyte skeleton. *Mol Biochem Parasitol* 111(1):107–121.
- Spycher C, et al. (2006) Genesis of and trafficking to the Maurer's clefts of *Plasmodium falciparum*-infected erythrocytes. *Mol Cell Biol* 26(11):4074–4085.
- Florens L, et al. (2004) Proteomics approach reveals novel proteins on the surface of malaria-infected erythrocytes. *Mol Biochem Parasitol* 135(1):1–11.
- Maier AG, et al. (2008) Exported proteins required for virulence and rigidity of *Plasmodium falciparum*-infected human erythrocytes. *Cell* 134(1):48–61.
- Regev-Rudzki N, et al. (2013) Cell-cell communication between malaria-infected red blood cells via exosome-like vesicles. *Cell* 153(5):1120–1133.
- Heiber A, et al. (2013) Identification of new PNEPs indicates a substantial non-PEXEL exportome and underpins common features in *Plasmodium falciparum* protein export. *PLoS Pathog* 9(8):e1003546.
- Vincensini L, et al. (2005) Proteomic analysis identifies novel proteins of the Maurer's clefts, a secretory compartment delivering *Plasmodium falciparum* proteins to the surface of its host cell. *Mol Cell Proteomics* 4(4):582–593.
- Sam-Yellowe TY, et al. (2004) A *Plasmodium* gene family encoding Maurer's cleft membrane proteins: Structural properties and expression profiling. *Genome Res* 14(6):1052–1059.
- Tsarukyanova I, Drazba JA, Fujioka H, Yadav SP, Sam-Yellowe TY (2009) Proteins of the *Plasmodium falciparum* two transmembrane Maurer's cleft protein family, PfMC-2TM, and the 130 kDa Maurer's cleft protein define different domains of the infected erythrocyte intramembranous network. *Parasitol Res* 104(4):875–891.
- Lavazec C, Sanyal S, Templeton TJ (2006) Hypervariability within the Rifin, Stevor and Pfmc-2TM superfamilies in *Plasmodium falciparum*. *Nucleic Acids Res* 34(22):6696–6707.
- Kun JF, et al. (1997) A putative *Plasmodium falciparum* exported serine/threonine protein kinase. *Mol Biochem Parasitol* 85(1):41–51.
- Kulangara C, et al. (2012) Cell biological characterization of the malaria vaccine candidate trophozoite exported protein 1. *PLoS ONE* 7(10):e46112.
- Nunes MC, Goldring JP, Doerig C, Scherf A (2007) A novel protein kinase family in *Plasmodium falciparum* is differentially transcribed and secreted to various cellular compartments of the host cell. *Mol Microbiol* 63(2):391–403.
- Mattei D, Scherf A (1992) The Pf332 gene of *Plasmodium falciparum* codes for a giant protein that is translocated from the parasite to the membrane of infected erythrocytes. *Gene* 110(1):71–79.
- Hinterberg K, et al. (1994) *Plasmodium falciparum*: The Pf332 antigen is secreted from the parasite by a brefeldin A-dependent pathway and is translocated to the erythrocyte membrane via the Maurer's clefts. *Exp Parasitol* 79(3):279–291.
- Nilsson S, Angeletti D, Wahlgren M, Chen Q, Moll K (2012) *Plasmodium falciparum* antigen 332 is a resident peripheral membrane protein of Maurer's clefts. *PLoS ONE* 7(11):e46980.
- Mbengue A, Audiger N, Vialla E, Dubremetz JF, Braun-Breton C (2013) Novel *Plasmodium falciparum* Maurer's clefts protein families implicated in the release of infectious merozoites. *Mol Microbiol* 88(2):425–442.
- Knuepfer E, Rug M, Klonis N, Tilley L, Cowman AF (2005) Trafficking of the major virulence factor to the surface of transfected *P. falciparum*-infected erythrocytes. *Blood* 105(10):4078–4087.
- Wickham ME, et al. (2001) Trafficking and assembly of the cytoadherence complex in *Plasmodium falciparum*-infected human erythrocytes. *EMBO J* 20(20):5636–5649.
- Rug M, Prescott SW, Fernandez KM, Cooke BM, Cowman AF (2006) The role of KAHRP domains in knob formation and cytoadherence of *P. falciparum*-infected human erythrocytes. *Blood* 108(1):370–378.
- Taylor DW, et al. (1987) Localization of *Plasmodium falciparum* histidine-rich protein 1 in the erythrocyte skeleton under knobs. *Mol Biochem Parasitol* 25(2):165–174.
- Knuepfer E, Rug M, Klonis N, Tilley L, Cowman AF (2005) Trafficking determinants for PfEMP3 export and assembly under the *Plasmodium falciparum*-infected red blood cell membrane. *Mol Microbiol* 58(4):1039–1053.
- Zhu X, Yahata K, Alexandre JS, Tsuboi T, Kaneko O (2013) The N-terminal segment of *Plasmodium falciparum* SURFIN4.1 is required for its trafficking to the red blood cell cytosol through the endoplasmic reticulum. *Parasitol Int* 62(2):215–229.
- Alexandre JS, Yahata K, Kawai S, Torii M, Kaneko O (2011) PEXEL-independent trafficking of *Plasmodium falciparum* SURFIN4.2 to the parasite-infected red blood cell and Maurer's clefts. *Parasitol Int* 60(3):313–320.
- Winter G, et al. (2005) SURFIN is a polymorphic antigen expressed on *Plasmodium falciparum* merozoites and infected erythrocytes. *J Exp Med* 201(11):1853–1863.
- Blythe JE, et al. (2008) *Plasmodium falciparum* STEVOR proteins are highly expressed in patient isolates and located in the surface membranes of infected red blood cells and the apical tips of merozoites. *Infect Immun* 76(7):3329–3336.
- Przyborski JM, et al. (2005) Trafficking of STEVOR to the Maurer's clefts in *Plasmodium falciparum*-infected erythrocytes. *EMBO J* 24(13):2306–2317.
- Kaviratne M, Khan SM, Jarra W, Preiser PR (2002) Small variant STEVOR antigen is uniquely located within Maurer's clefts in *Plasmodium falciparum*-infected red blood cells. *Eukaryot Cell* 1(6):926–935.
- Niang M, Yan Yam X, Preiser PR (2009) The *Plasmodium falciparum* STEVOR multigene family mediates antigenic variation of the infected erythrocyte. *PLoS Pathog* 5(2):e1000307.
- Kyes SA, Rowe JA, Kriek N, Newbold CI (1999) Rifins: A second family of clonally variant proteins expressed on the surface of red cells infected with *Plasmodium falciparum*. *Proc Natl Acad Sci USA* 96(16):9333–9338.
- Petter M, et al. (2007) Variant proteins of the *Plasmodium falciparum* RIFIN family show distinct subcellular localization and developmental expression patterns. *Mol Biochem Parasitol* 156(1):51–61.
- Haeggström M, et al. (2004) Common trafficking pathway for variant antigens destined for the surface of the *Plasmodium falciparum*-infected erythrocyte. *Mol Biochem Parasitol* 133(1):1–14.
- Haeggström M, VON Euler A, Kironde F, Fernandez V, Wahlgren M (2007) Characterization of Maurer's clefts in *Plasmodium falciparum*-infected erythrocytes. *Am J Trop Med Hyg* 76(1):27–32.
- Khattab A, Klinkert MQ (2006) Maurer's clefts-restricted localization, orientation and export of a *Plasmodium falciparum* RIFIN. *Traffic* 7(12):1654–1665.
- Joannin N, Abhiman S, Sonnhammer EL, Wahlgren M (2008) Sub-grouping and sub-functionalization of the RIFIN multi-copy protein family. *BMC Genomics* 9:19.
- Mayer C, Slater L, Erat MC, Konrat R, Vakonakis I (2012) Structural analysis of the *Plasmodium falciparum* erythrocyte membrane protein 1 (PEMP1) intracellular domain reveals a conserved interaction epitope. *J Biol Chem* 287(10):7182–7189.
- Coppel RL, Lustigman S, Murray L, Anders RF (1988) MESA is a *Plasmodium falciparum* phosphoprotein associated with the erythrocyte membrane skeleton. *Mol Biochem Parasitol* 31(3):223–231.
- Howard RJ, et al. (1988) Two approximately 300 kilodalton *Plasmodium falciparum* proteins at the surface membrane of infected erythrocytes. *Mol Biochem Parasitol* 27(2-3):207–223.
- Brown GV, et al. (1985) Localization of the ring-infected erythrocyte surface antigen (RESA) of *Plasmodium falciparum* in merozoites and ring-infected erythrocytes. *J Exp Med* 162(2):774–779.
- Nqitragool W, et al. (2011) Malaria parasite clag3 genes determine channel-mediated nutrient uptake by infected red blood cells. *Cell* 145(5):665–677.
- Sharma P, et al. (2013) An epigenetic antimalarial resistance mechanism involving parasite genes linked to nutrient uptake. *J Biol Chem* 288(27):19429–19440.
- Goel S, et al. (2010) Dual stage synthesis and crucial role of cytoadherence-linked asexual gene 9 in the surface expression of malaria parasite var proteins. *Proc Natl Acad Sci USA* 107(38):16643–16648.
- Pachlatko E, et al. (2010) MAHRP2, an exported protein of *Plasmodium falciparum*, is an essential component of Maurer's cleft tethers. *Mol Microbiol* 77(5):1136–1152.
- Külzer S, et al. (2010) Parasite-encoded Hsp40 proteins define novel mobile structures in the cytosol of the *P. falciparum*-infected erythrocyte. *Cell Microbiol* 12(10):1398–1420.
- Külzer S, et al. (2012) *Plasmodium falciparum*-encoded exported hsp70/hsp40 chaperone/co-chaperone complexes within the host erythrocyte. *Cell Microbiol* 14(11):1784–1795.
- Grover M, Chaubey S, Ranade S, Tatu U (2013) Identification of an exported heat shock protein 70 in *Plasmodium falciparum*. *Parasite* 20:2.
- Perkins M (1988) Stage-dependent processing and localization of a *Plasmodium falciparum* protein of 130,000 molecular weight. *Exp Parasitol* 65(1):61–68.
